# Supplementary material
Source: Research Square preprint supplement (doi:10.21203/rs.3.rs-8613405/v1)
Supplement: Supplementary file 1 [file 315f318c93cee41e7b67e96f.docx]

**Data collection tool**

**Participant code No; __________ ( take from the log book)**

**Section one; Socio-demographic related questions**

| **s.no** | **Question** | **Alternative** |  |
| --- | --- | --- | --- |
| 101 | What is your age in years? | ________years |  |
| 102 | Your sex | 1. Male 2. Female |  |
| 103 | What grade are you in? | 1. Grade 9 2. Grade 10 3. Grade 11 4. Grade 12 |  |
| 104 | Type of school you study in | 1. Private 2. Government |  |
| 105 | How many siblings do you have? | _________ siblings |  |

**Section two; Smartphone use related question**

| **s.no** | **Question** | **Alternative** |  |
| --- | --- | --- | --- |
| 201 | When did you start to use smartphone? | ________ years and ________ months ago |  |
| 202 | Is it your smartphone that you use or someone else’s? | 1. It is mine. 2. It is my father’s phone. 3. It is my mother’s phone. 4. It is my sibling’s phone. 5. Other, please specify _____________________ |  |
| 203 | Where did you use the smartphone most of the time? | 1. At home 2. At school 3. Both at home and school 4. Other, please specify ___________ |  |
| 204 | What did you watch via your smartphone? (for what purpose did you use the smartphone?) (can choose more than one) | 1. Accessing Educational Apps 2. Group assignment 3. To Communicate with my friends 4. To communicate with my parents 5. Gaming 6. For social media (like telegram, Instagram, tiktok, Facebook) 7. To listen to music 8. To watch video 9. Other specify------- |  |
| 205 | What is the source of your internet? (can chose more than one) | 1. Wifi (at home) 2. Wifi (other than home, e.g., school) 3. Mobile data 4. Other specify -------- |  |
| 206 | How many days did you use smartphone per week? | ----------------days/week |  |
| 207 | How much time will you spend using smartphone per day? | ______hours and _______ minutes per day |  |
| 208 | When did you use smartphone? | 1. In the morning 2. Mid-day 3. Afternoon 4. At night 5. The whole day 6. Other specify-------- |  |

**Section 3; Problematic Smartphone use/Smartphone Addiction Scale Short Version (SAS-SV)**

| No. | Question | 1 = strongly disagree | 2 = disagree | 3 = weakly disagree | 4 = weakly agree | 5 = agree | 6 = strongly agree |
| --- | --- | --- | --- | --- | --- | --- | --- |
| 1 | Missing planned activities (like Doing homework, Preparing for exam, Doing sports, Playing with friends) to smartphone use |  |  |  |  |  |  |
| 2 | Having a hard time concentrating in class, or while doing assignments, due to smartphone use |  |  |  |  |  |  |
| 3 | Feeling pain in the wrists or at the back of the neck while using a smartphone |  |  |  |  |  |  |
| 4 | Won’t be able to stand not having a smartphone |  |  |  |  |  |  |
| 5 | Feeling impatient and fretful when I am not holding my smartphone |  |  |  |  |  |  |
| 6 | Having my smartphone in my mind even when I am not using it |  |  |  |  |  |  |
| 7 | I will never give up using my smartphone even when my daily life is already greatly affected by it. |  |  |  |  |  |  |
| 8 | Constantly checking my smartphone so as not to miss conversations between other people on Twitter or Facebook |  |  |  |  |  |  |
| 9 | Using my smartphone longer than I had intended |  |  |  |  |  |  |
| 10 | The people around me tell me that I use my smartphone too much. |  |  |  |  |  |  |

**Section four: Depression and stress related questions**

The rating scale is as follows:

1. Did not apply to me at all
2. Applied to me to some degree, or some of the time
3. Applied to me to a considerable degree or a good part of time
4. Applied to me very much or most of the time

| **s.no** | **Questions** | **Alternatives** | | | |
| --- | --- | --- | --- | --- | --- |
| 1 (s) | I found it hard to wind down | 0 | 1 | 2 | 3 |
| 2 (a) | I was aware of dryness of my mouth | 0 | 1 | 2 | 3 |
| 3 (d) | I couldn’t seem to experience any positive feeling at all | 0 | 1 | 2 | 3 |
| 4 (a) | I experienced breathing difficulty (e.g. excessively rapid breathing, breathlessness in the absence of physical exertion) | 0 | 1 | 2 | 3 |
| 5 (d) | I found it difficult to work up the initiative to do things | 0 | 1 | 2 | 3 |
| 6 (s) | I tended to over-react to situations | 0 | 1 | 2 | 3 |
| 7 (a) | I experienced trembling (e.g. in the hands) | 0 | 1 | 2 | 3 |
| 8 (s) | I felt that I was using a lot of nervous energy | 0 | 1 | 2 | 3 |
| 9 (a) | I was worried about situations in which I might panic and make a fool of myself | 0 | 1 | 2 | 3 |
| 10 (d) | I felt that I had nothing to look forward to | 0 | 1 | 2 | 3 |
| 11 (s) | I found myself getting agitated | 0 | 1 | 2 | 3 |
| 12 (s) | I found it difficult to relax | 0 | 1 | 2 | 3 |
| 13 (d) | I felt down-hearted and blue | 0 | 1 | 2 | 3 |
| 14 (s) | I was intolerant of anything that kept me from getting on with what I was doing | 0 | 1 | 2 | 3 |
| 15 (a) | I felt I was close to panic | 0 | 1 | 2 | 3 |
| 16 (d) | I was unable to become enthusiastic about anything | 0 | 1 | 2 | 3 |
| 17 (d) | I felt I wasn’t worth much as a person | 0 | 1 | 2 | 3 |
| 18 (s) | I felt that I was rather touchy | 0 | 1 | 2 | 3 |
| 19 (a) | I was aware of the action of my heart in the absence of physical exertion (e.g. sense of heart rate increase, heart missing a beat) | 0 | 1 | 2 | 3 |
| 20 (a) | I felt scared without any good reason | 0 | 1 | 2 | 3 |
| 21 (d) | I felt that life was meaningless | 0 | 1 | 2 | 3 |

**Section five; Academic performance**

| s.no | Question | Response |
| --- | --- | --- |
| 5.1 | What was your first semester mathematics subject score? | ________/100 |
|  | What was the first semester mathematics score of the student? | **_______/100 to be obtained from the roster** |
| 5.2 | What was your first semester English subject score? | **-----------/100** |
|  | What was the first semester English subject of the student? | **_______/100 to be obtained from the roster** |
| 5.3 | What was your first semester chemistry subject score? |  |
|  | What was the first semester chemistry subject of the student? | **_______/100 to be obtained from the roster** |
| 5.4 | What was your first semester Economics subject score? |  |
|  | What was the first semester Economics subject of the student? | **_______/100 to be obtained from the roster** |
| 5.5 | What was your first semester rank? |  |
|  | What was y last semester rank of the student | **__________ to be obtained from the roster** |
